# Supplementary material
Source: publisher figshare collection journal article supplement (https://tandf.figshare.com/articles/dataset/_/11617761)
Supplement: Supplementary file 1 [file 1]

Archive with 2 entries (2 files):
- tbio_a_1705184_sm1557.pdf
- tbio_a_1705184_sm1545.mp4
