# Supplementary material
Source: publisher figshare collection journal article supplement (https://tandf.figshare.com/articles/dataset/_/11617761)

**Supplementary Materials 1: Individual differences in call class production over the study period.**

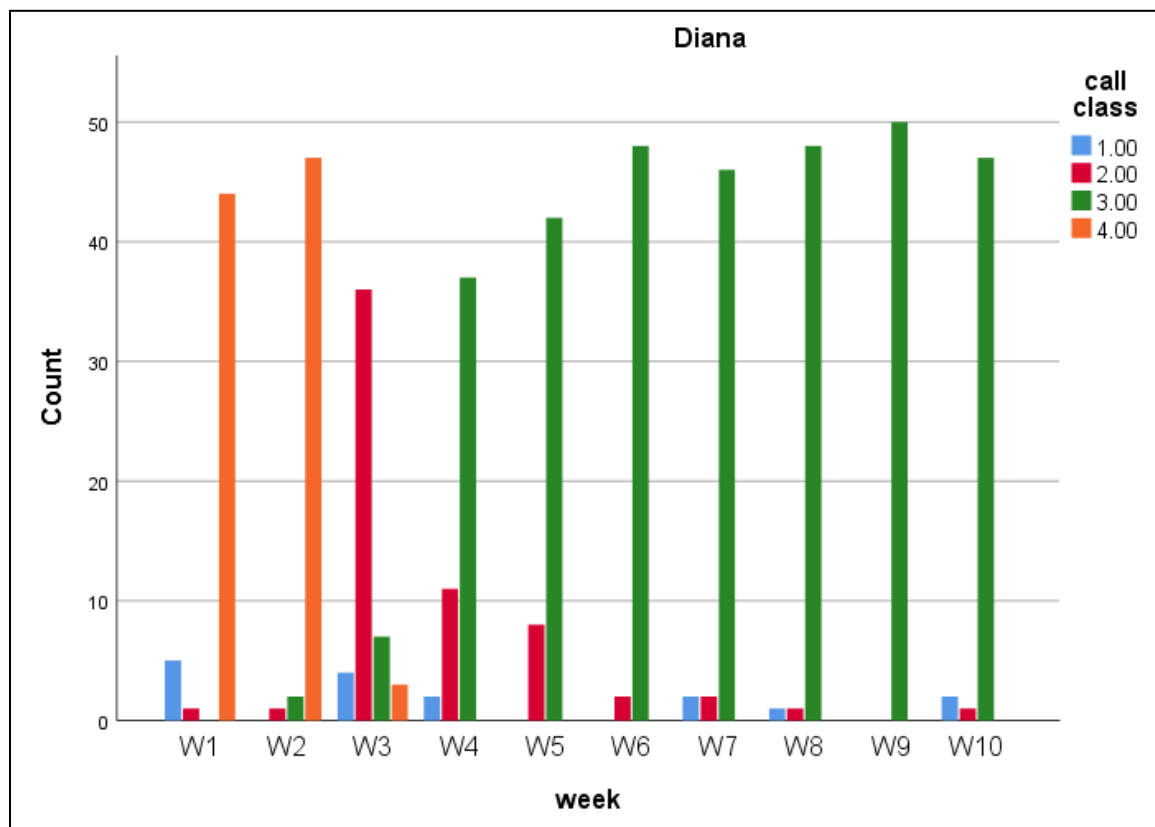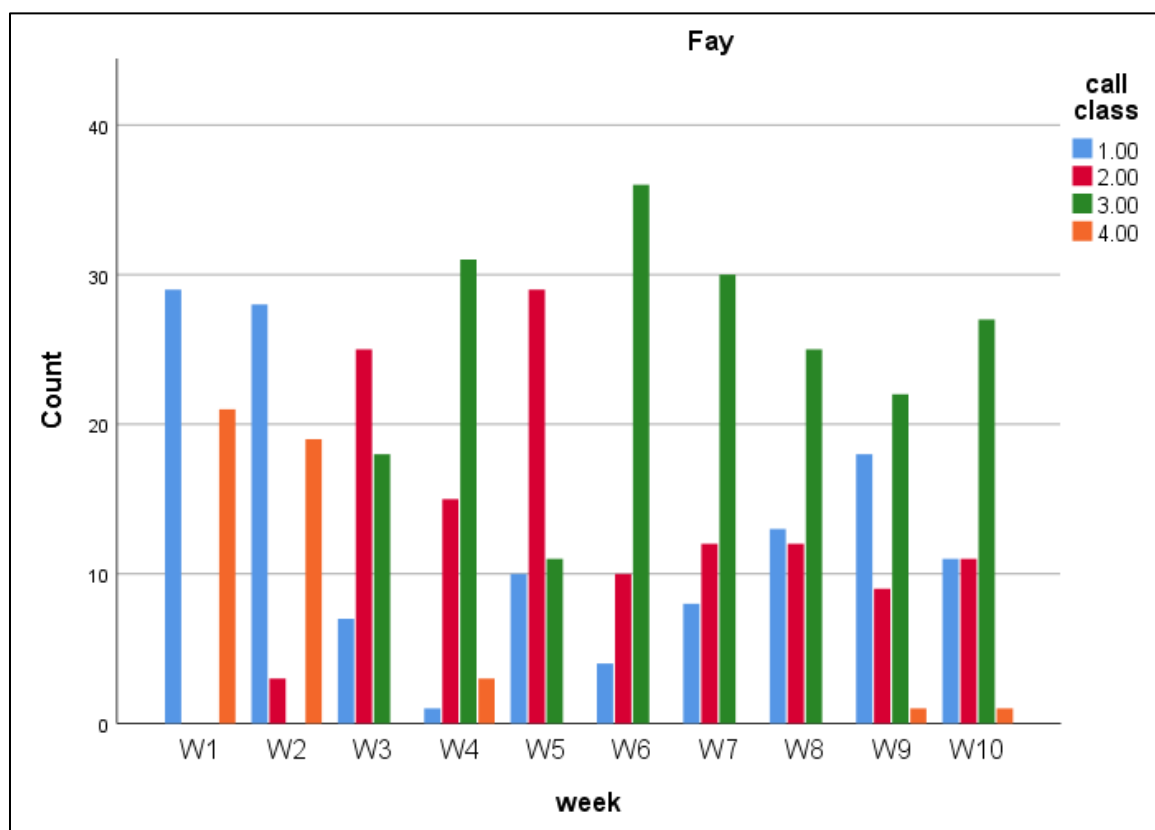

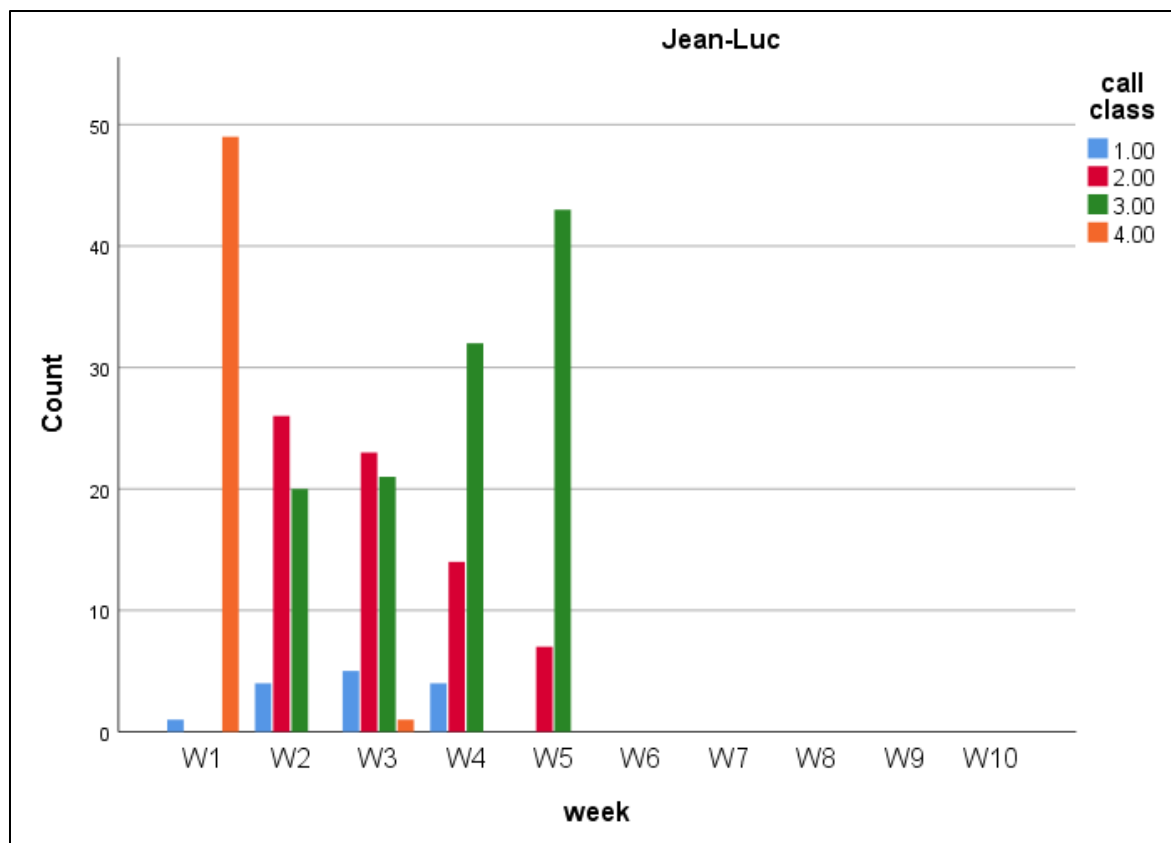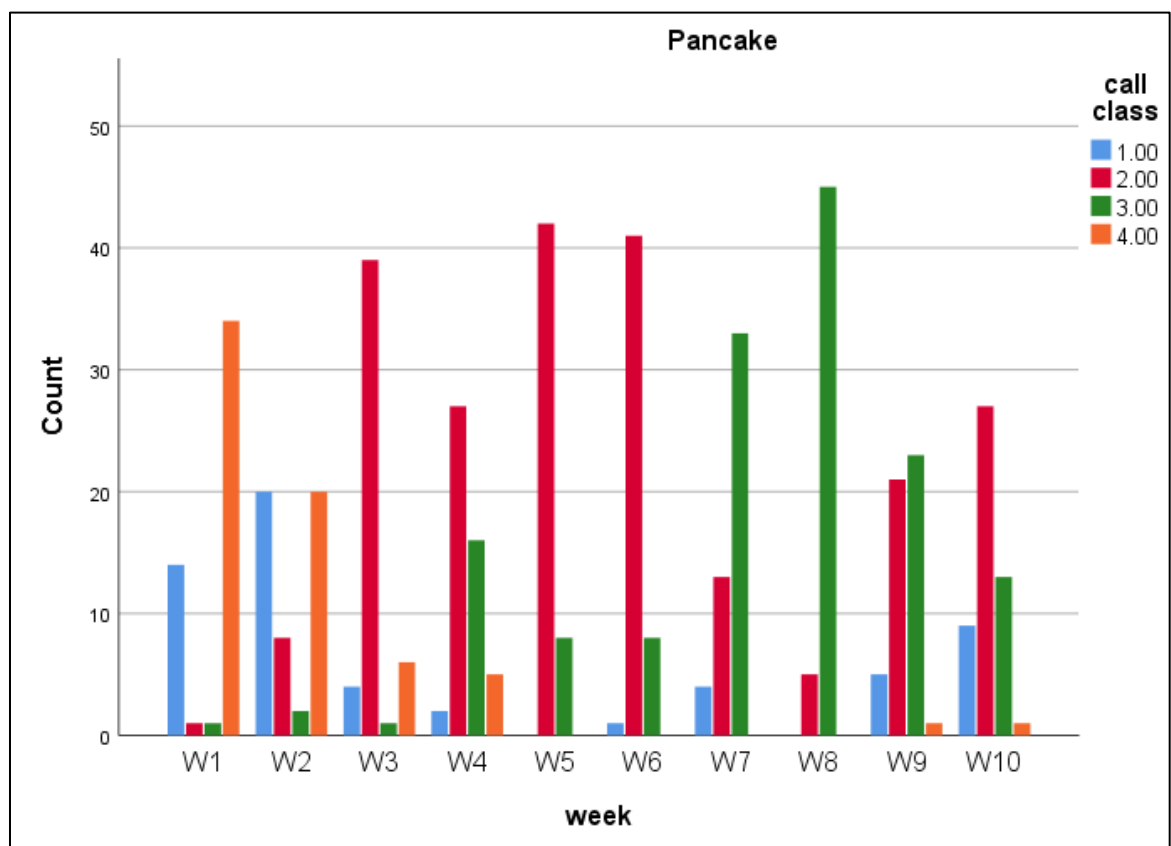

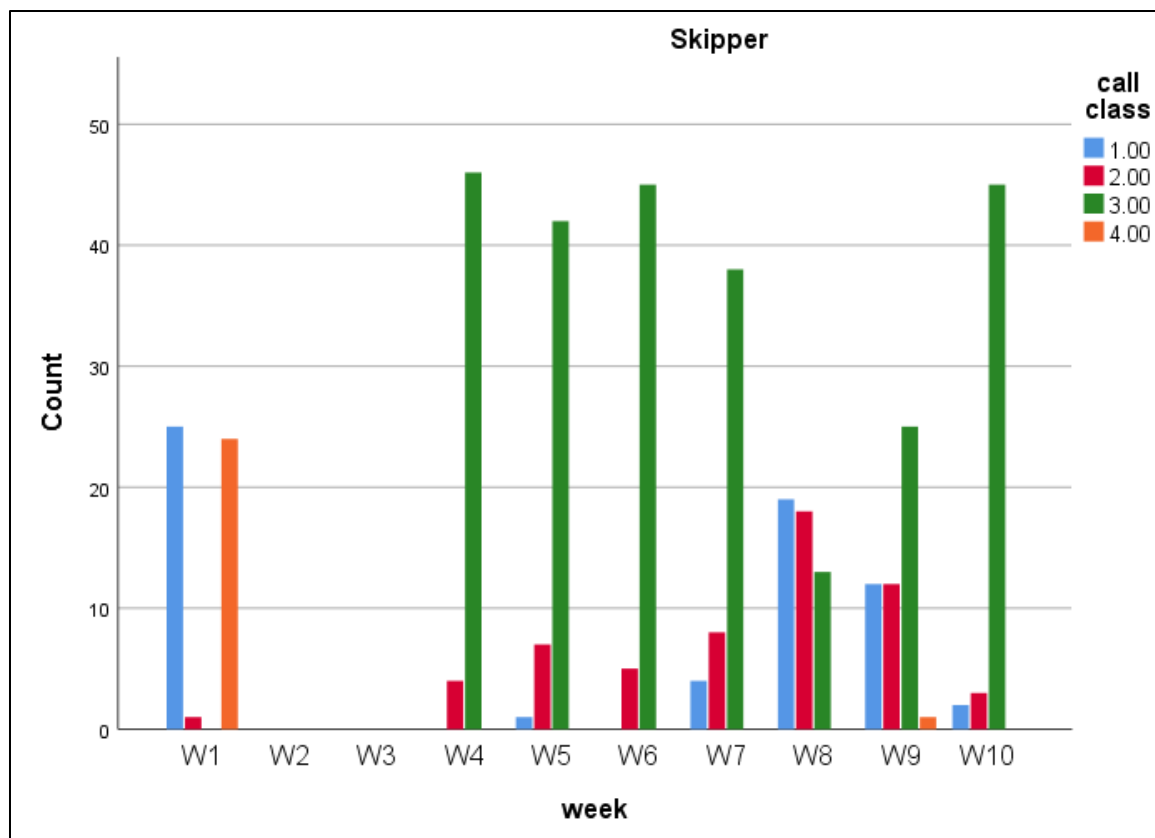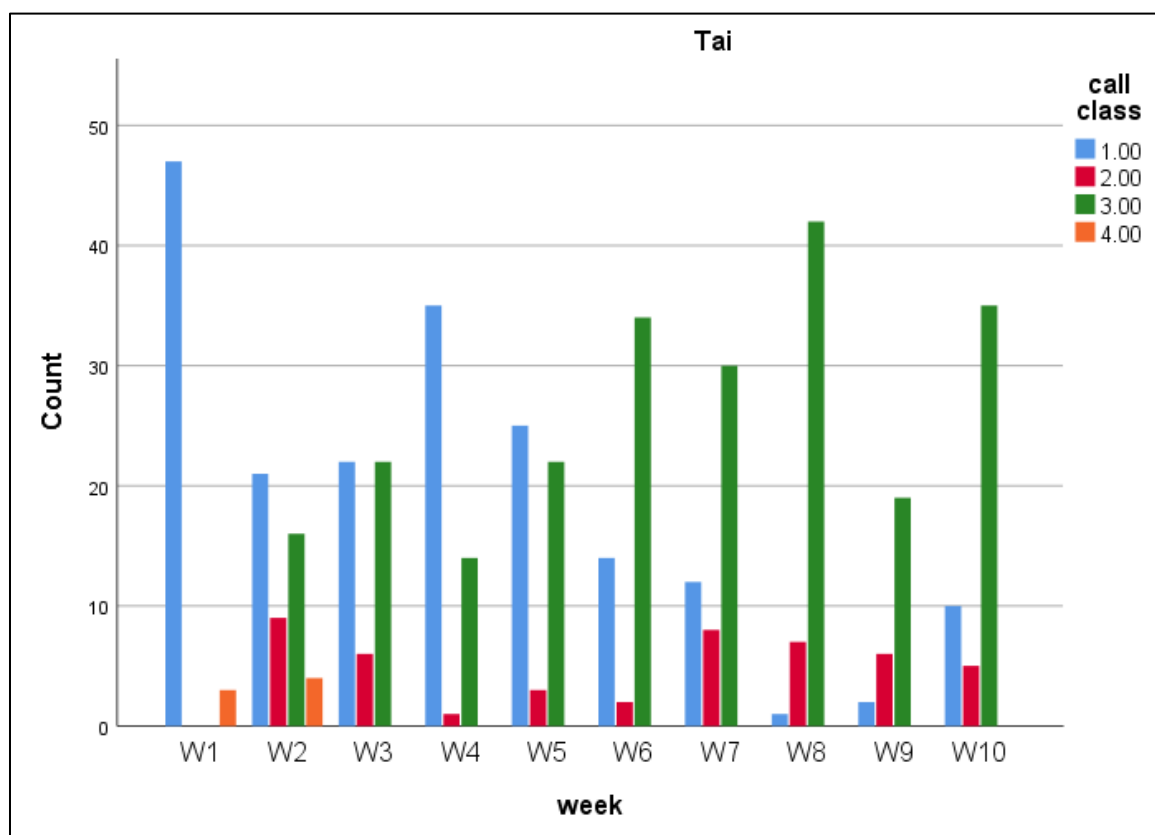

Supplement: Supplementary file 1 [file 1 › tbio_a_1705184_sm1557.pdf]
